# Supplementary material for: Visiting Urban Green Space and Orientation to Nature Is Associated with Better Wellbeing during COVID-19
Source: MDPI journal article supplement (doi:10.3390/ijerph20043559), 2023-02-17
Supplement: s1 [file s1]

**Supplementary Table S1.** Descriptive statistics of Brisbane and Sydney survey populations.

|                                       | <b>Brisbane</b> | <b>Sydney</b> |
|---------------------------------------|-----------------|---------------|
| PWI (mean, sd)                        | 51.87 (10.70)   | 50.47 (11.47) |
| Nature relatedness (mean, sd)         | 3.54 (0.62)     | 3.48 (0.60)   |
| Change in wellbeing (count)           |                 |               |
| Negative                              | 174             | 185           |
| Same                                  | 661             | 652           |
| Positive                              | 215             | 197           |
| Change in yard visits (count)         |                 |               |
| Much less                             | 38              | 36            |
| Less                                  | 99              | 84            |
| Same                                  | 558             | 474           |
| More                                  | 193             | 221           |
| Much more                             | 64              | 69            |
| Don't have yards (na)                 | 98              | 150           |
| Change in green space visits (count)  |                 |               |
| Much less                             | 57              | 47            |
| Less                                  | 110             | 138           |
| Same                                  | 613             | 585           |
| More                                  | 215             | 228           |
| Much more                             | 55              | 36            |
| Duration of yard visit last week      |                 |               |
| No time                               | 48              | 73            |
| 1–30 min                              | 170             | 137           |
| 31 min to 1 h                         | 131             | 163           |
| 1–3 h                                 | 225             | 229           |
| 3–5 h                                 | 145             | 125           |
| 5–7 h                                 | 83              | 70            |
| 7–9 h                                 | 58              | 36            |
| more than 9 h                         | 92              | 50            |
| Don't have a yard or deck             | 98              | 150           |
| Frequency of yard visit               |                 |               |
| never                                 | 24              | 41            |
| less than once a month                | 59              | 60            |
| 2–3 times a month                     | 74              | 81            |
| once a week                           | 144             | 159           |
| 2–3 days a week                       | 205             | 203           |
| 4–5 days a week                       | 190             | 144           |
| 6–7 days a week                       | 256             | 196           |
| Don't have a yard or deck             | 98              | 150           |
| Frequency of public green space visit |                 |               |
| never                                 | 36              | 43            |
| once a year                           | 36              | 39            |
| once every three months               | 97              | 85            |
| once a month                          | 146             | 110           |
| 2–3 times a month                     | 125             | 124           |
| once a week                           | 151             | 164           |
| 2–3 days a week                       | 194             | 187           |

|                                                |     |     |
|------------------------------------------------|-----|-----|
| 3–5 days a week                                | 113 | 138 |
| 6–7 days a week                                | 152 | 144 |
| Duration of public green space visit last week |     |     |
| Never                                          | 277 | 302 |
| 1 h                                            | 171 | 176 |
| 2 h                                            | 144 | 112 |
| 3 h                                            | 87  | 98  |
| 4 h                                            | 78  | 70  |
| 5 h                                            | 65  | 48  |
| 6 h                                            | 29  | 40  |
| 7 h                                            | 24  | 39  |
| 8 h                                            | 25  | 18  |
| 9 h                                            | 16  | 24  |
| 10 or more hours                               | 128 | 104 |
| NA                                             | 6   | 3   |
| Age group (count)                              |     |     |
| 18–20 years                                    | 35  | 27  |
| 21–25 years                                    | 87  | 83  |
| 26–30 years                                    | 76  | 66  |
| 31–35 years                                    | 90  | 110 |
| 36–40 years                                    | 94  | 97  |
| 41–45 years                                    | 100 | 109 |
| 46–50 years                                    | 84  | 78  |
| 51–55 years                                    | 83  | 89  |
| 56–60 years                                    | 90  | 76  |
| 61–65 years                                    | 90  | 86  |
| 66–70 years                                    | 102 | 92  |
| more than 70 years                             | 119 | 121 |
| Gender (count)                                 |     |     |
| Female                                         | 505 | 520 |
| Male                                           | 540 | 511 |
| NA                                             | 3   | 3   |
| Income (count)                                 |     |     |
| Nil or negative income                         | 10  | 27  |
| \$1–\$199 a week                               | 28  | 21  |
| \$200–\$299 a week                             | 23  | 21  |
| \$300–\$399 a week                             | 40  | 44  |
| \$400–\$599 a week                             | 90  | 83  |
| \$600–\$799 a week                             | 80  | 68  |
| \$800–\$999 a week                             | 80  | 73  |
| \$1000–\$1249 a week                           | 104 | 118 |
| \$1250–\$1499 a week                           | 91  | 93  |
| \$1500–\$1999 a week                           | 130 | 140 |
| \$2000 or more a week                          | 236 | 200 |
| Prefer not to say                              | 138 | 146 |

**Supplementary Table S2.** The associations between personal wellbeing and nature experiences and nature orientation—sensitivity analysis performed without individuals that indicated they did not have a yard.

|                                       | <b>Estimate</b> | <b>SE</b> | <b><i>p</i></b> |
|---------------------------------------|-----------------|-----------|-----------------|
| (Intercept)                           | 34.473          | 1.952     | <0.001          |
| Frequency of yard visit               | 0.793           | 0.216     | <0.001          |
| Duration of yard visit                | −0.223          | 0.184     | 0.228           |
| Frequency of public green space visit | 0.425           | 0.139     | 0.002           |
| Duration of public green space visit  | 0.053           | 0.086     | 0.536           |
| Nature relatedness                    | 1.270           | 0.480     | 0.008           |
| Age                                   | 0.459           | 0.081     | <0.001          |
| Gender                                | 0.264           | 0.541     | 0.626           |
| Income                                | 0.663           | 0.099     | <0.001          |
| City (Sydney)                         | −0.860          | 0.525     | 0.102           |
